# Supplementary material for: The performance and mechanism for the catalytic oxidation of dibromomethane (CH2Br2) over Co3O4/TiO2 catalysts
Source: Royal Society of Chemistry journal article supplement (doi:10.1039/c6ra00372a), 2016-01-01

*Supporting Information*

**The performance and mechanism for the catalytic oxidation  
of dibromomethane ( $\text{CH}_2\text{Br}_2$ ) over  $\text{Co}_3\text{O}_4/\text{TiO}_2$  catalysts**

Jian Mei, Songjian Zhao, Haomiao Xu, Zan Qu, Naiqiang Yan\*

---

School of Environmental Science and Engineering, Shanghai Jiao Tong University, 800 Dong Chuan Road,  
Shanghai, 200240, PR China.

\*Corresponding author, Tel: +86 21 54745591; Fax: +86 21 54745591  
E-mail address: nqyan@sjtu.edu.cn (Naiqiang Yan)

The internal diffusion effect was checked by changing the particle size of the catalyst and the results were shown in Fig. S2. The data obtained in the experiments showed that the catalytic reaction was operated without diffusional limitation under 10% conversion of DBM ( $< 220\text{ }^{\circ}\text{C}$ ). And the kinetic studies were carried out in the temperature range of  $180\text{--}210\text{ }^{\circ}\text{C}$  over CoTi-5 in the form of  $250\text{--}425\text{ }\mu\text{m}$ .

### **Figure captions**

**Fig. S1** SEM images of (a) CoTi-1, (b) CoTi-2.5, (c) CoTi-5, (d) CoTi-10 and (e) CoTi-25.

**Fig. S2** The effect of catalyst particle size for DBM oxidation over CoTi-5.

**Fig. S3** DBM conversion over CoTi-5 as a function of time at 300 °C.

**Fig. S1**

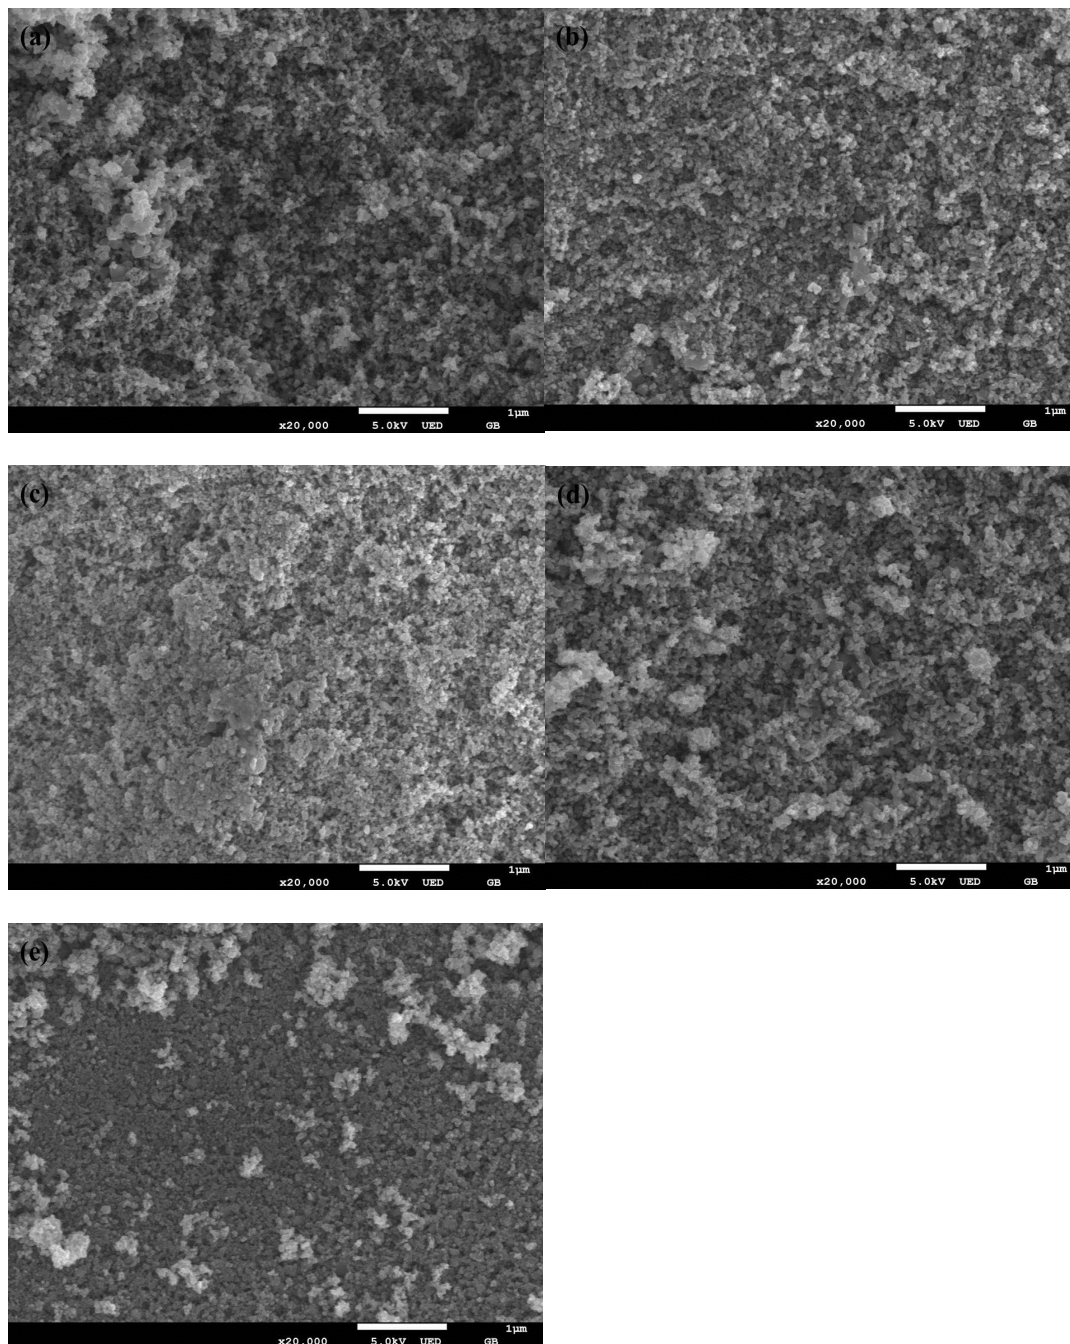

Fig. S2

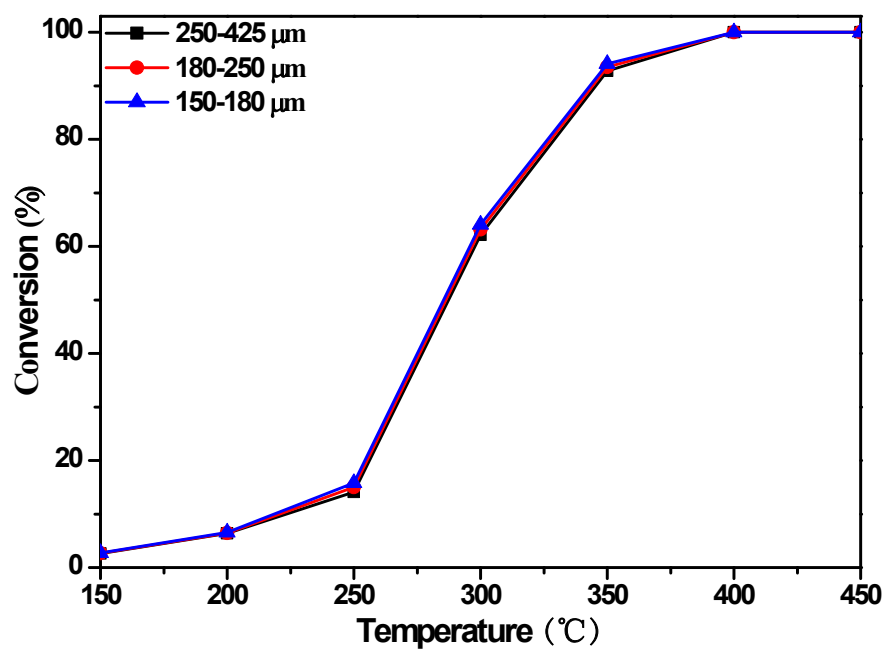

Fig. S3

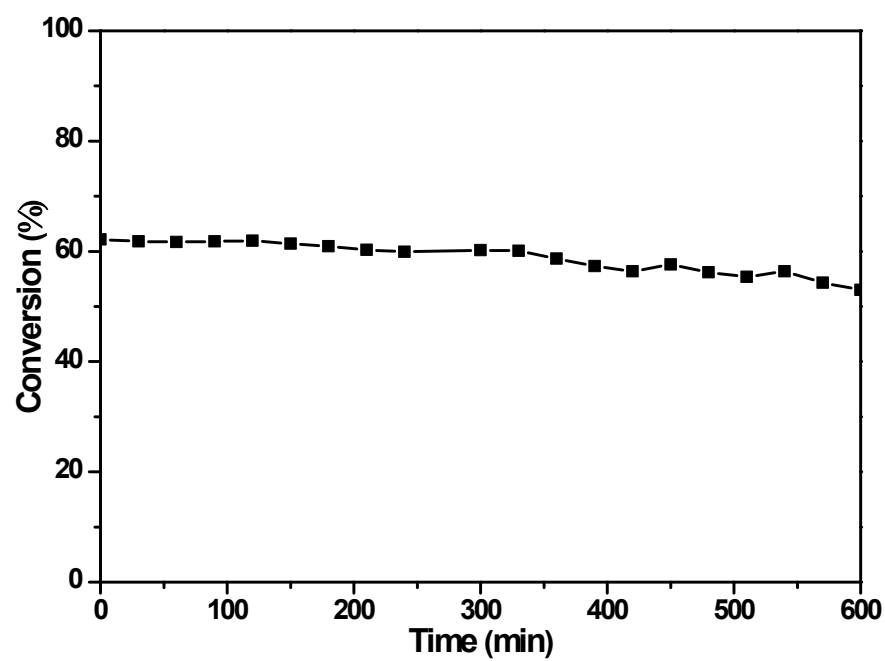

Supplement: c6ra00372a1.pdf [file c6ra00372a1.pdf]
